# Supplementary material for: A CD28 superagonistic antibody elicits 2 functionally distinct waves of T cell activation in rats
Source: JCI journal article supplement (doi:10.1172/jci32698), 2008-03-18
Supplement: sd1 [file 1]

## **Supplementary Material**

**CD28 superagonistic antibodies elicit two  
functionally distinct waves of T cell activation  
(Müller et al.)**

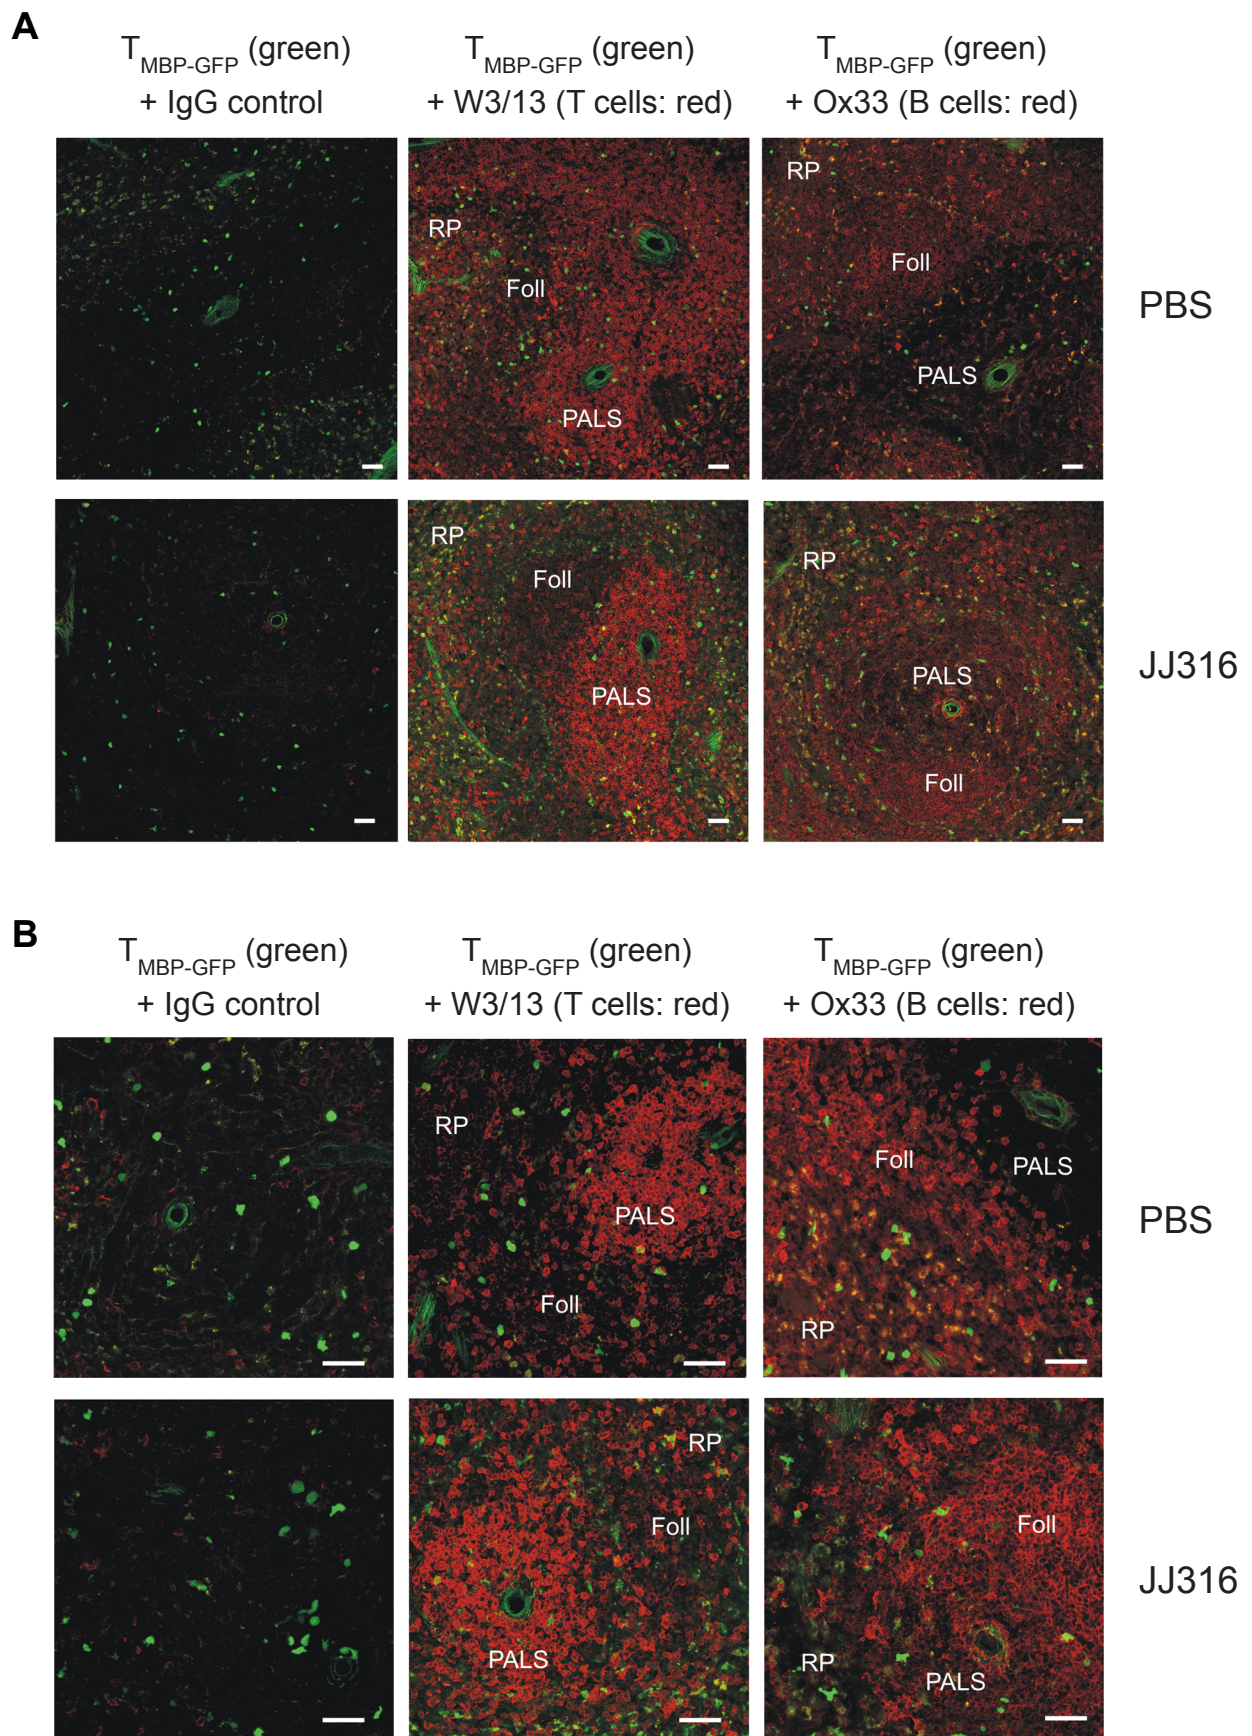

Supplementary Figure 1; Müller et al.

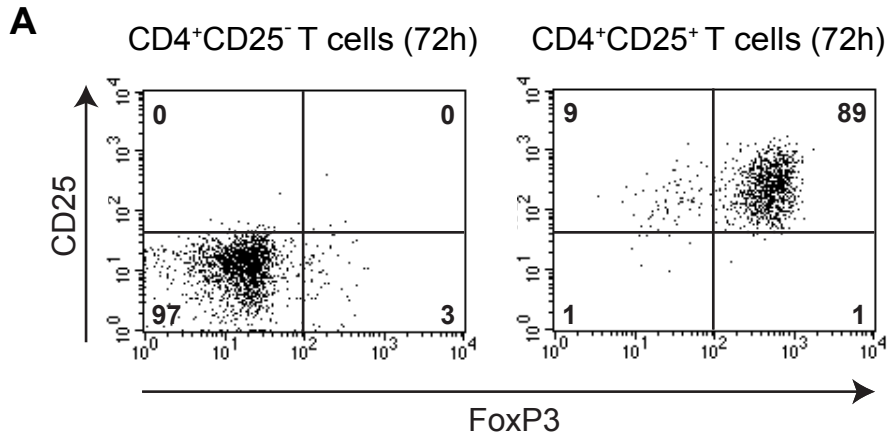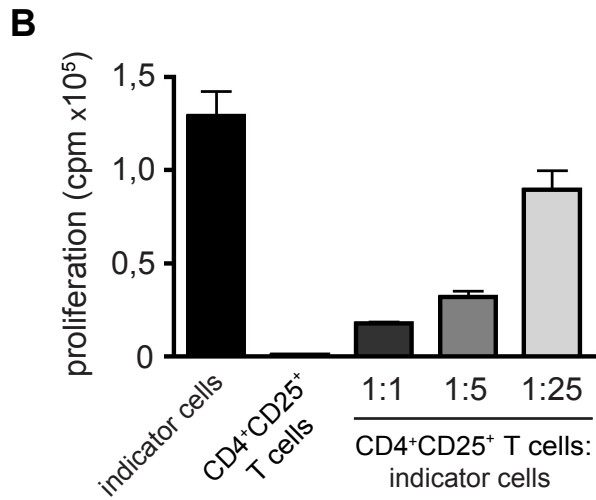

Supplementary Figure 2; Müller et al.

## Supplementary Figure legends

**Suppl. Fig. 1: Adoptively transferred effector T cells distribute throughout the red pulp and the T cell areas of the spleen.**  $T_{\text{MBP-GFP}}$  cells were visualized within the spleen 60 hours after adoptive transfer and one hour after infusion of 1.0 mg JJ316 or PBS.  $T_{\text{MBP-GFP}}$  cells (green fluorescence) are localized in the red pulp (RP) and the T cell areas of the white pulp (periarteriolar lymphocyte sheaths, PALS). Fewer cells are found within the B cell follicles (Foll). The cell distribution does not substantially change after JJ316 treatment. Sections were additionally stained with mouse IgG (isotype control, left panel), W3/13 to identify T cell areas (red fluorescence, middle panel) or Ox33 to identify B cell areas (red fluorescence, right panel). **(A)** 20x objective; **(B)** 40x oil objective. Magnification bars: 50  $\mu\text{m}$ .

**Suppl. Fig. 2:  $CD4^+CD25^+$  T cells isolated 72 hours after JJ316 infusion coexpress FoxP3 and suppress T cell proliferation.** **(A)** Rats were injected with 1.0 mg JJ316 and 72 hours later  $CD4^+CD25^-$  as well as  $CD4^+CD25^+$  T cells were purified by magnetic cell sorting followed by flow cytometric analysis for CD25 and FoxP3 expression. The relative percentages of each cell population are depicted. **(B)** The capacity of the  $CD4^+CD25^+$  T cells to inhibit the proliferation of conventional T lymphocytes was tested in an in vitro suppression assay based on the incorporation of [ $^3\text{H}$ ]-thymidine into DNA. The proliferation of indicator T cells,  $CD4^+CD25^+$  T cells and of indicator cells after adding decreasing numbers of  $CD4^+CD25^+$  T cells is depicted.

## Supplementary Methods

### Immunohistochemistry and -fluorescence of tissue sections

Animals having received  $5 \times 10^6$  effector  $T_{\text{MBP-GFP}}$  cells by adoptive transfer were perfused with 4% PFA. Subsequently, the spleen was prepared and postfixed in 4% PFA overnight. The frozen organs were cut into 20  $\mu\text{m}$  sections and stained with Ox33 (monoclonal anti-ratCD45RA antibody, specific for B cells, 1:500) or W3/13 (monoclonal anti-ratCD43 antibody, specific for T cells, 1:500) overnight at 4°C (BD Biosciences). The control antibody (MOPC31, mouse IgG) was purchased from Sigma. Cy3-labeled anti-mouse antiserum (Dianova) was used as a secondary antibody. Fluorescence analysis was performed using a confocal laser scanning microscope (Leica).

### In vitro suppression assay

$\text{CD4}^+\text{CD25}^-$  indicator T cells purified from naïve rats ( $5 \times 10^5$  cells/ml) were cultured for 72 h together with irradiated spleen cells serving as APCs ( $5 \times 10^5$  cells/ml) in the presence of Concanavalin A (2  $\mu\text{g/ml}$ , Sigma) in RPMI-1640 medium supplemented with 10 % FCS and 1 % Pen/Strep using 96-well flat bottom plates.  $\text{CD4}^+\text{CD25}^+$  *bona fide*  $T_{\text{reg}}$  cells purified from JJ316 treated rats were added to the indicator cell cultures at different amounts (0,  $5 \times 10^5$ ,  $1 \times 10^5$ ,  $2 \times 10^4$  cells). As a control,  $5 \times 10^5$   $\text{CD4}^+\text{CD25}^+$  *bona fide*  $T_{\text{reg}}$  cells were cultured in the absence of indicator cells. Proliferation was assessed by measuring [ $^3\text{H}$ ]-thymidine (Amersham Biosciences) incorporation during the final 16 h of the culturing period. The DNA of [ $^3\text{H}$ ]-thymidine-pulsed cells was harvested onto fiberglass filters and the radioactive content was quantitated using a  $\beta$ -scintillation counter.
